# Supplementary material for: Diversity and distribution of orchid bees (Hymenoptera: Apidae, Euglossini) in Belize
Source: PeerJ. 2023 Feb 20;11:e14928. doi: 10.7717/peerj.14928 (PMC9948752; doi:10.7717/peerj.14928)
Supplement: Supplemental Information 1 — Location, site characteristics, and transect lengths for Period I samples. See Table 1 for site codes. Ecosystem classification is based on Meerman & Sabido (2001) with information in parentheses added by us. [file peerj-11-14928-s001.xlsx]

## Sheet: Sheet1
Site code	Decimal latitude	Decimal longitude	Ecosystem classification	Distance (m) between first and last trap in transect
BR	17.055°N	89.068°W	Tropical evergreen seasonal broadleaf forest over calcareous hills (adjacent to citrus groves)	1400
MPR	17.059°N	88.960°W	Tropical evergreen seasonal needle-leaf submontane forest	3300
CR	17.152°N	89.063°W	Tropical evergreen seasonal broadleaf lowland forest over calcareous hills	4500
PG1	16.094°N	88.838°W	Tropical evergreen broadleaf lowland swamp forest	1000
PG2	16.088°N	88.846°W	Tropical evergreen broadleaf lowland swamp forest	550
PG3	16.094°N	88.831°W	Tropical evergreen broadleaf lowland swamp forest	230
DP	16.229°N	88.946°W	Mechanized agriculture (includes rice fields and uncultivated wetlands)	600
CS1	16.791°N	88.443°W	Tropical evergreen seasonal broadleaf lowland forest over poor or sand soils	5760
CS2	16.779°N	88.458°W	Tropical evergreen seasonal broadleaf lowland forest over poor or sand soils	600
HP	16.856°N	88.309°W	Tropical evergreen seasonal broadleaf lowland forest over poor or sand soils	250
