# Supplementary material for: Diversity and distribution of orchid bees (Hymenoptera: Apidae, Euglossini) in Belize
Source: PeerJ. 2023 Feb 20;11:e14928. doi: 10.7717/peerj.14928 (PMC9948752; doi:10.7717/peerj.14928)
Supplement: Supplemental Information 2 — Location, site characteristics, and transect lengths for Period II samples. See Table 2 for site codes. Superscripts under precipitation refer to three categories of symbol colors in Fig. 2; A relatively dry, B intermediate, and C relatively wet. Ecosystem classification is based on Meerman & Sabido (2001) with information in parentheses added by us. See Materials and Methods for details on source of information and definition of Agricultural Presence Index. Elevation values are midpoints between the traps with the lowest and highest elevations at each site. [file peerj-11-14928-s002.xlsx]

## Sheet: Sheet1
Site code	Decimal latitude	Decimal longitude	Elevation (m)	Precipitation (mm)	Ecosystem classification	Agricultural presence index	Distance (m) between first and last trap in transect
CT1	17.792°N	88.540°W	15	1723A	Tropical evergreen seasonal broadleaf lowland swamp forest	0	540
CT2	17.775°N	88.498°W	15	1723A	Tropical evergreen seasonal needle-leaf lowland dense forest	0	1100
CT3	17.794°N	88.543°W	15	1723A	Tropical evergreen seasonal broadleaf lowland swamp forest	0	400
LM1	17.842°N	89.021°W	150	1443A	Tropical evergreen seasonal broadleaf lowland hill forest	0	600
LM2	17.837°N	89.019°W	160	1443A	Tropical evergreen seasonal broadleaf lowland hill forest	0	650
LM3	17.806°N	89.022°W	170	1443A	Tropical evergreen seasonal broadleaf lowland hill forest	0	1930
LM4	17.846°N	89.037°W	150	1443A	Tropical evergreen seasonal broadleaf lowland hill forest	0	800
BR1	17.042°N	89.059°W	90	1614A	Tropical evergreen seasonal broadleaf forest over calcareous hills	0	800
BR2	17.061°N	89.070°W	90	1614A	Tropical evergreen seasonal broadleaf forest over calcareous hills	0	650
BR3	17.047°N	89.063°W	85	1614A	Tropical evergreen seasonal broadleaf forest over calcareous hills (adjacent to citrus groves)	1	320
NM1	17.088°N	89.099°W	150	1614A	Agroproductive systems (pastures and citrus groves)	1	1125
NM2	17.079°N	89.091°W	120	1614A	Agroproductive systems (pastures)	1	1000
LC1	16.733°N	88.986°W	580	1975A	Tropical evergreen seasonal broadleaf submontane forest	0	150
LC2	16.739°N	88.985°W	600	1975A	Tropical evergreen seasonal broadleaf submontane forest	0	500
LC3	16.733°N	88.987°W	585	1975A	Tropical evergreen seasonal broadleaf submontane forest	0	500
LC4	16.733°N	88.984°W	590	1975A	Tropical evergreen seasonal broadleaf submontane forest	0	500
LC5	16.731°N	88.987°W	590	1975A	Tropical evergreen seasonal broadleaf submontane forest	0	500
CR1	17.152°N	88.962°W	110	1975A	Tropical evergreen seasonal broadleaf lowland forest over calcareous hills (adjacent to citrus groves)	1	2350
CR2	17.025°N	88.945°W	150	1975A	Tropical evergreen seasonal broadleaf lowland forest over calcareous hills (adjacent to citrus groves)	1	1530
MPR	17.139°N	88.960°W	150	1975A	Tropical evergreen seasonal needle-leaf submontane forest	0	960
PG1	16.095°N	88.836°W	20	3460C	Tropical evergreen broadleaf lowland swamp forest	0	650
PG2	16.087°N	88.816°W	15	3460C	Tropical evergreen broadleaf lowland swamp forest	0	450
PG3	16.091°N	88.850°W	20	3460C	Tropical evergreen broadleaf lowland swamp forest	0	1600
DP	16.229°N	88.946°W	20	3460C	Mechanized agriculture (includes rice fields and uncultivated wetlands)	1	1250
RB	16.095°N	88.836°W	240	2822C	Tropical evergreen seasonal broadleaf lowland forest over calcareous hills	0	400
FS	16.284°N	89.094°W	55	2822C	Tropical evergreen seasonal broadleaf lowland hill forest (adjacent to citrus groves and milpas)	1	410
YG	16.182°N	88.921°W	40	3460 C	Tropical evergreen broadleaf lowland swamp forest	0	1900
PS1	16.480°N	88.590°W	35	2410B	Short-grass savannah	0	970
PS2	16.774°N	88.378°W	20	2146B	Short-grass savannah	0	1250
PS3	16.778°N	88.400°W	40	2146B	Short-grass savannah	0	2100
CS1	16.791°N	88.439°W	120	2146B	Tropical evergreen seasonal broadleaf lowland forest over poor or sand soils	0	710
CS2	16.778°N	88.458°W	70	2146B	Tropical evergreen seasonal broadleaf lowland forest over poor or sand soils	0	710
CS3	16.782°N	88.464°W	60	2146B	Tropical evergreen seasonal broadleaf lowland forest over poor or sand soils	0	660
CS4	16.787°N	88.452°W	80	2146B	Tropical evergreen seasonal broadleaf lowland forest over poor or sand soils	0	650
CS5	16.771°N	88.452°W	80	2146B	Tropical evergreen seasonal broadleaf lowland forest over poor or sand soils	0	700
HP1	16.855°N	88.322°W	20	2410B	Tropical evergreen seasonal broadleaf lowland forest over poor or sand soils (adjacent to citrus groves)	1	2430
HP2	16.855°N	88.360°W	20	2410B	Tropical evergreen seasonal broadleaf lowland forest over poor or sand soils (adjacent to citrus grove)	1	610
HC1	17.017°N	88.320°W	25	2410B	Tropical evergreen seasonal needle-leaf lowland dense forest	0	1360
HC2	17.034°N	88.330°W	30	2410B	Tropical evergreen seasonal broadleaf lowland forest over poor or sand soils (adjacent to citrus grove)	1	1930
MB1	16.936°N	88.320°W	35	2410B	Tropical evergreen seasonal broadleaf lowland forest over poor or sand soils (adjacent to citrus grove)	1	980
MB2	16.927°N	88.386°W	100	2410B	Tropical evergreen seasonal broadleaf lowland forest over poor or sand soils	0	500
MB3	16.933°N	88.389°W	70	2410B	Tropical evergreen seasonal broadleaf lowland forest over poor or sand soils	0	500
HH1	17.091°N	88.662°W	100	2146B	Agroproductive systems (within citrus groves)	1	400
HH2	17.099°N	88.662°W	75	2146B	Agroproductive systems (within citrus groves)	1	450
