# Supplementary material for: Diversity and distribution of orchid bees (Hymenoptera: Apidae, Euglossini) in Belize
Source: PeerJ. 2023 Feb 20;11:e14928. doi: 10.7717/peerj.14928 (PMC9948752; doi:10.7717/peerj.14928)
Supplement: Supplemental Information 3 — Location, site characteristics, and transect lengths for Period III samples. See Table 3 for site codes. Ecosystem classification is based on Meerman & Sabido (2001), with information in parentheses added by us. [file peerj-11-14928-s003.xlsx]

## Sheet: Sheet1
Site code	Decimal latitude	Decimal longitude	Ecosystem classification	Distance (m) between first and last trap in transect
PH1	17.155°N	88.851°W	Tropical evergreen seasonal broadleaf lowland forest over calcareous hills	750
PH2	17.155°N	88.853°W	Tropical evergreen seasonal broadleaf lowland forest over calcareous hills	750
MB1	16.928°N	88.390°W	Tropical evergreen seasonal broadleaf lowland forest over poor or sand soils	750
MB2	16.933°N	88.389°W	Tropical evergreen seasonal broadleaf lowland forest over poor or sand soils	980
BR1	17.061°N	89.070°W	Tropical evergreen seasonal broadleaf forest over calcareous hills (adjacent to citrus groves)	650
BR2	17.042°N	89.064°W	Tropical evergreen seasonal broadleaf forest over calcareous hills	480
NM1	17.079°N	89.091°W	Agroproductive systems (pastures and citrus groves)	1000
PG1	16.095°N	88.836°W	Tropical evergreen broadleaf lowland swamp forest	650
PG2	16.087°N	88.816°W	Tropical evergreen broadleaf lowland swamp forest	660
PG3	16.095°N	88.832°W	Tropical evergreen broadleaf lowland swamp forest	750
FS	16.286°N	89.955°W	Tropical evergreen seasonal broadleaf lowland hill forest (adjacent to citrus groves and milpas)	740
DP	16.229°N	88.946°W	Mechanized agriculture (includes rice fields and uncultivated wetlands)	1250
YG	16.182°N	88.921°W	Tropical evergreen broadleaf lowland swamp forest	1900
CS	16.778°N	88.458°W	Tropical evergreen seasonal broadleaf lowland forest over poor or sand soils	710
HC	17.034°N	88.330°W	Tropical evergreen seasonal broadleaf lowland forest over poor or sand soils (adjacent to citrus groves)	1930
HP	16.855°N	88.315°W	Tropical evergreen seasonal broadleaf lowland forest over poor or sand soils (adjacent to citrus groves)	1600
HH	17.091°N	88.662°W	Agroproductive systems (within a citrus grove)	750
