# Supplementary material for: Diversity and distribution of orchid bees (Hymenoptera: Apidae, Euglossini) in Belize
Source: PeerJ. 2023 Feb 20;11:e14928. doi: 10.7717/peerj.14928 (PMC9948752; doi:10.7717/peerj.14928)
Supplement: Supplemental Information 4 — Location, site characteristics, and transect lengths for Period IV samples. See Table 4 for site codes. Ecosystem classification is based on Meerman & Sabido (2001), with information in parentheses added by us. [file peerj-11-14928-s004.xlsx]

## Sheet: Sheet1
Site code	Decimal latitude	Decimal longitude	Ecosystem classification	Distance (m) between first and last trap in transect
BR1	17.055°N	89.068°W	Tropical evergreen seasonal broadleaf forest over calcareous hills (adjacent to citrus groves)	650
BR2	17.061°N	89.070°W	Tropical evergreen seasonal broadleaf forest over calcareous hills	900
NM1	17.079°N	89.091°W	Agroproductive systems (pastures)	1250
NM2	17.087°N	89.094°W	Tropical evergreen seasonal broadleaf forest over calcareous hills (adjacent to pastures)	500
PG1	16.095°N	88.836°W	Tropical evergreen broadleaf lowland swamp forest	450
PG2	16.087°N	88.816°W	Tropical evergreen broadleaf lowland swamp forest	750
YG	16.182°N	88.921°W	Tropical evergreen broadleaf lowland swamp forest	750
DP	16.229°N	88.946°W	Mechanized agriculture (includes rice fields and uncultivated wetlands)	450
HP	16.855°N	88.315°W	Tropical evergreen seasonal broadleaf lowland forest over poor or sand soils (adjacent to citrus groves)	1850
CS1	16.771°N	88.452°W	Tropical evergreen seasonal broadleaf lowland forest over poor or sand soils	750
CS2	16.782°N	88.464°W	Tropical evergreen seasonal broadleaf lowland forest over poor or sand soils	550
CS3	16.790°N	88.456°W	Tropical evergreen seasonal broadleaf lowland forest over poor or sand soils	550
CS4	16.782°N	88.464°W	Tropical evergreen seasonal broadleaf lowland forest over poor or sand soils	850
CS5	16.753°N	88.399°W	Short-grass savannah	700
HC	17.034°N	88.330°W	Tropical evergreen seasonal broadleaf lowland forest over poor or sand soils (adjacent to citrus groves)	2200
