# Supplementary material for: Diversity and distribution of orchid bees (Hymenoptera: Apidae, Euglossini) in Belize
Source: PeerJ. 2023 Feb 20;11:e14928. doi: 10.7717/peerj.14928 (PMC9948752; doi:10.7717/peerj.14928)
Supplement: Supplemental Information 5 — Numbers of orchid bees of each species captured in Period I, and the mean number per sample. SD = standard deviation; CV = coefficient of variation. Sites are listed in order of the date on which they were sampled. See Table 1 for site codes. [file peerj-11-14928-s005.xlsx]

## Sheet: Sheet1
	Sites										Species summaries
Species	BR	MPR	CR	PG1	PG2	PG3	DP	CS1	CS2	HP	Total	Percent	Mean	SD	CV
Ef. concava	1	4									5	0.7	0.5	1.3	254
Ef. rugosa	6										6	0.8	0.6	1.9	316
Eg. allosticta	1	3	4			2		1	1	1	13	1.7	1.3	1.3	103
Eg. hansoni									1		1	0.1	0.1	0.3	316
Eg. heterosticta	1	1	4	4	8	8	3	12	9		50	6.6	5	4	81
Eg. ignita				30	27	37		2	1		97	12.8	9.7	15.1	156
Eg. imperialis	36	32	12	1	2	3		1	1		88	11.6	8.8	13.8	156
Eg. mixta	22	16	21	7	6	1		8	9	3	93	12.3	9.3	7.9	85
Eg. obtusa	1	3		6	1	5			2		18	2.4	1.8	2.2	122
Eu. purpurea		3	1	23	18	17	3	69	74	4	212	28	21.2	27.7	131
Eu. tridentata	7	4	5	3	5	2	14	3	2	7	52	6.9	5.2	3.6	69
Eg. variabilis			1							1	2	0.3	0.2	0.4	211
Eg. viridissima					4						4	0.5	0.4	1.3	316
El. cingulata	7	15	17	25	5	9	1	6	7	4	96	12.7	9.6	7.3	76
El. meriana					1	1					2	0.3	0.2	0.4	211
Ex. frontalis								1			1	0.1	0.1	0.3	316
Ex. smaragdina	4		8	2	1				2		17	2.2	1.7	2.6	152
Total	86	81	73	101	78	85	21	103	109	20	757
