# Supplementary material for: Diversity and distribution of orchid bees (Hymenoptera: Apidae, Euglossini) in Belize
Source: PeerJ. 2023 Feb 20;11:e14928. doi: 10.7717/peerj.14928 (PMC9948752; doi:10.7717/peerj.14928)
Supplement: Supplemental Information 6 — Numbers of orchid bees of each species captured in Period II (Dec 2016–March 2017) (continued on following 2 pages). SD = standard deviation; CV = coefficient of variation. Sites are listed in order of the date on which they were sampled. See Table 2 for site codes. [file peerj-11-14928-s006.xlsx]

## Sheet: Sheet1
	Sites																																												Species summaries
Species	CT1	CT2	CT3	LM1	LM2	LM3	LM4	BR1	BR2	BR3	NM1	NM2	LC1	LC2	LC3	LC4	LC5	CR1	CR2	MPR	PG1	PG2	PG3	DP	RB	FS	YG	PS1	PS2	PS3	CS1	CS2	CS3	CS4	CS5	HP1	HP2	CH1	CH2	MB1	MB2	MB3	HH1	HH2	Total	Mean	SD	CV
Ef. concava				2			2		1	2								2	5																										14	0.3	0.9	294
Ef. rugosa					2			3		5																																			10	0.2	0.9	402
Eg. allosticta								1													1					1				1		1				1	1		1		1	3			12	0.3	0.6	214
Eg. deceptrix											8	2																															3		13	0.2	1.2	544
Eg. dilemma																																					1	2		2	1				6	0.1	0.5	340
Eg. heterosticta								1	1			1									2		5			1				1	2	7	2	11	6		1			1		3		1	46	1	2.2	212
Eg. ignita																					7		10	5	8	6	1							1	1			1	1						41	0.9	2.4	254
Eg. imperialis	1			4	6	11	4	6	8	6	1	4			1	1	1		9		2		1		16	22	8			1								1		5	3	18			140	3.2	5.2	163
Eg. mixta				3	2	3	2		3		2		2	4	9	7			1		6	1	5		4	1	3		1		5	1	2	1		2				3	2	1			76	1.7	2.1	124
Eg. obtusa								1						3	1	1	1					1		3	8		4				4		4	1	2		1				1				36	0.8	1.6	198
Eg. purpurea																1					115	44	148	22	8	7	40	2	5	8	30	82	93	36	38	36	7	7	7	15	13	9	1		774	17.6	32.9	187
Eg. tridentata					8	4		1	2	3	3	5						1	6		4	3	3	39	2	16	6					2	3	1	3	16	2	8	1	4	5	11	5	4	171	3.9	6.7	171
Eg. variabilis			1					1											3								1										1	1	1				2	7	18	0.4	1.2	290
Eg. viridissima	29	18	23	1		1	1				1	1						1			3	4	1	1			1			3		1	1			2		2	3	2	2	1			103	2.3	6	254
El. cingulata	3	1	4	16	18	12	12	18	33	13	10	6	5	1	5	12	5	16	18	10	14	9	7	5	11	14	8	1	16	9	12	3	16	6	9	13	18	19	11	12	14	29	9	4	487	11.1	6.8	61
El. meriana																										1						1	1		1	1				1	13	7			26	0.6	2.2	373
El. polychroma					1			1										2											1									1		1			1		8	0.2	0.4	245
Ex. frontalis																																1	4	2	1		1				3	2			14	0.3	0.9	269
Ex. smaragdina				1	3	1	4	2	6	6					2		1		1						2	1				1	2		3	1	1					1	1	2	1		43	1	1.5	152
TOTAL	33	19	28	27	40	32	25	35	54	35	25	19	7	8	18	22	8	22	43	10	154	62	180	75	59	70	72	3	23	24	55	99	129	60	62	71	33	42	25	47	59	86	22	16	2038
