# Supplementary material for: Diversity and distribution of orchid bees (Hymenoptera: Apidae, Euglossini) in Belize
Source: PeerJ. 2023 Feb 20;11:e14928. doi: 10.7717/peerj.14928 (PMC9948752; doi:10.7717/peerj.14928)
Supplement: Supplemental Information 7 — Numbers of orchid bees of each species captured in Period III. SD = standard deviation; CV = coefficient of variation. Sites are listed in order of the date on which they were sampled. See Table 3 for site codes. [file peerj-11-14928-s007.xlsx]

## Sheet: Sheet1
	Sites																	Species summaries
Species	PH1	PH2	MB1	BR1	NM	BR2	PG1	PG2	FS	DP	YG	CS	PG3	HH	HC	HP	MB2	Total	Mean	SD	CV
Ef. concava				7	1													8	0.47	1.7	361
Ef. rugosa				1	2													3	0.18	0.53	301
Ef. schmidtiana			1															1	0.06	0.24	413
Eg. allosticta		3	1															4	0.24	0.75	320
Eg. bursigera								1										1	0.06	0.24	413
Eg. deceptrix	1						2		1			1	1			4		10	0.59	1.06	186
Eg. dilemma													3	1				4	0.24	0.75	234
Eg. heterosticta		1	1				6	2	3	3	4	28	12			1	5	66	3.88	6.95	179
Eg. ignita							6	5	9	3	8	2	7		3	1		44	2.59	3.2	124
Eg. imperialis	28	28	12	50	7		2	1	9		7	1	3		2		9	159	9.35	13.7	146
Eg. mixta	1	2	3	5	3		6	2	1			1	16	2	1	3		46	2.71	3.84	142
Eg. obtusa			1		1		1	3			2	2	3			1	1	15	0.88	1.05	120
Eg. tridentata	20	14	4	9	7	2	17	22	8	14	6	21	15	7	21	55	8	250	14.71	12.21	83
Eg. variabilis								1		1				10	1			13	0.76	2.41	313
Eg. viridissima							4	8	1			1		4	4	2		24	1.41	2.29	162
El. cingulata	1	1	1	3	1	2		2	13	8	8	12	22	15	4	4	16	113	6.65	6.65	100
El. meriana		.	20						4	1					3	6	23	57	3.35	7.07	211
El. polychroma										1				3				4	0.24	0.75	320
Ex. frontalis		1	1									2	1				1	6	0.35	0.61	172
Ex. smaragdina	6	12	16	2				1	1			2				3	3	46	2.71	4.61	170
Total	57	62	61	77	22	4	44	48	50	31	35	73	83	42	39	80	66	874
