# Supplementary material for: Diversity and distribution of orchid bees (Hymenoptera: Apidae, Euglossini) in Belize
Source: PeerJ. 2023 Feb 20;11:e14928. doi: 10.7717/peerj.14928 (PMC9948752; doi:10.7717/peerj.14928)
Supplement: Supplemental Information 8 — Numbers of orchid bees of each species captured in Period IV. SD = standard deviation; CV = coefficient of variation. Sites are listed in order of the date on which they were sampled. See Table 4 for site codes. [file peerj-11-14928-s008.xlsx]

## Sheet: Sheet1
	Sites															Species summaries
Species	BR1	NM1	BR2	NM2	PG1	PG2	YG	DP	HP	CS1	CS2	CS3	CS4	CS5	HC	Total	Mean	SD	CV
Eg. cyanura	-	-	-	-	1	-	-	-	-	-	-	-	-	-	-	1	0.1	0.3	401
Eg. deceptrix	-	-	1	-	-	-	-	-	-	-	-	-	-	-	1	2	0.1	0.4	272
Eg. dilemma	2	5	1	3	1	-	-	-	-	-	-	-	1	-	3	16	1.1	1.6	147
Eg. hemichlora	-	1	2	-	8	9	-	1	1	36	26	14	44	2	12	156	10.4	14.3	138
Eg. heterosticta	-	-	-	-	-	-	-	3	-	-	-	-	-	-	5	8	0.5	1.5	282
Eg. ignita	-	-	-	-	1	1	-	-	-	-	-	-	-	-	-	2	0.1	0.4	272
Eg. mixta	-	1	1	7	26	12	1	-	2	30	48	15	58	-	10	211	14.1	18.8	134
Eg. obtusa	-	-	-	-	8	24	4	2	-	2	8	3	4	-	1	56	3.7	6.4	171
Eg. purpurea	-	-	1	-	15	9	-	2	-	35	41	4	17	2	3	129	8.6	13.4	156
Eg. tridentata	-	5	-	11	7	10	5	36	8	-	7	1	3	3	15	111	7.4	9.2	124
Eg. variabilis	-	-	-	-	-	-	-	-	-	-	-	-	-	-	1	1	0.1	0.3	401
Eg. viridissima	1	6	1	7	40	67	2	6	5	7	1	2	-	4	9	158	10.5	18.9	179
El. cingulata	-	1	-	-	-	2	-	1	-	-	-	-	-	-	-	4	0.3	0.6	229
El. meriana	-	-	-	-	-	1	-	-	-	-	-	-	-	-	-	1	0.1	0.3	401
El. polychroma	5	5	3	8	9	4	-	-	1	-	-	-	-	-	5	40	2.7	3.2	120
Ex. smaragdina	3	-	-	2	1	-	-	-	-	-	-	-	-	-	-	6	0.4	0.6	145
TOTAL	11	24	10	38	117	139	12	51	17	110	131	39	127	11	65	902
