# Supplementary material for: Diversity and distribution of orchid bees (Hymenoptera: Apidae, Euglossini) in Belize
Source: PeerJ. 2023 Feb 20;11:e14928. doi: 10.7717/peerj.14928 (PMC9948752; doi:10.7717/peerj.14928)
Supplement: Supplemental Information 9 — Species of Euglossini not recorded in Belize, but which are known to occur in locations in Mexico and Central America both north and south of Belize, or at similar latitudes in Guatemala and Mexico. Based on information in Kimsey (1979), Roubik & Hanson (2004), Moure, Melo & Faria, (2012), and on records with complete location and collection site information in Ascher & Pickering (2019). [file peerj-11-14928-s009.xlsx]

## Sheet: Sheet1
Species
Eufriesea bartelli Gonzalez and Griswold
Eufriesea caerulescens (Lepeletier)
Eufriesea mexicana Mocsáry
Eufriesea mussitans (F.)
Eufriesea pallida (Kimsey)
Eufriesea simillima (Moure and Michener)
Eufriesea surinamensis (L.)
Euglossa atroveneta Dressler
Euglossa championi Cheesman
Euglossa cognata Moure
Euglossa crininota Dressler
Euglossa cybelia Moure
Euglossa dodsoni Moure
Euglossa erythrochlora Moure
Euglossa obrima Hinojosa-Díaz, Melo and Engel
Euglossa turnbifex Dressler
Euglossa villosa Moure
Eulaema nigrita Lepeletier
Eulaema seabrai Moure
